# Supplementary material for: Comparative Effectiveness of Pharmacotherapies for the Risk of Attempted or Completed Suicide Among Persons With Borderline Personality Disorder
Source: PubMed Central journal article supplement (PMC10248738; doi:10.1001/jamanetworkopen.2023.17130), 2023-06-07
Supplement: jamanetwopen-e2317130-s001.pdf [file jamanetwopen-e2317130-s001.pdf]

## Supplemental Online Content

Lieslehto J, Tiihonen J, Lähteenvuo M, Mittendorfer-Rutz E, Tanskanen A, Taipale H. Comparative effectiveness of pharmacotherapies for the risk of attempted or completed suicide among persons with borderline personality disorder. *JAMA Netw Open*. 2023;6(6):e2317130. doi:10.1001/jamanetworkopen.2023.17130

### **eMethods.**

**eTable 1.** Medications Used by the Persons With Borderline Personality Disorder at Some Point During the Follow-up

**eTable 2.** The Association Between Use vs Nonuse of Medications and Risk of Attempted or Completed Suicide in Within-Individual Analysis

**eTable 3.** The Association Between Use vs Nonuse of Medications and Risk of Attempted or Completed Suicide in Between-Individual Analysis

**eFigure 1.** Study Design

**eFigure 2.** Associations Between the Results From Within-Individual Modeling and Between-Individual Modeling

This supplemental material has been provided by the authors to give readers additional information about their work.

**eMethods.**

We identified the study population using data from inpatient and specialized outpatient care from the National Patient Registry as well as data on sickness absence and disability pension from the MiDAS register (Microdata for analysis of social insurance). The Prescribed Drug Register contained information about drugs dispensed. The classification of drug dispensing data is based on the anatomical therapeutic chemical (ATC) categorization, in addition to information on defined daily doses (DDDs), drug packages, and formulation. The Causes of Death Register was examined for death dates and causes. The longitudinal Integration Database for Health Insurance and Labor Market Studies (LISA) Register was used to collect information regarding the cohort's demographic characteristics and emigration.

**eTable 1.** Medications Used by the Persons With Borderline Personality Disorder (N= 22,601) at Some Point During the Follow-up

| Treatment         | Medication group | Number of Users | Percentage |
|-------------------|------------------|-----------------|------------|
| Polytherapy       | Antidepressant   | 9259            | 40.97      |
| Sertraline        | Antidepressant   | 6479            | 28.67      |
| Fluoxetine        | Antidepressant   | 4463            | 19.75      |
| Fluvoxamine       | Antidepressant   | 4204            | 18.60      |
| Venlafaxine       | Antidepressant   | 3986            | 17.64      |
| Mirtazapine       | Antidepressant   | 3470            | 15.35      |
| Duloxetine        | Antidepressant   | 2862            | 12.66      |
| Bupropion         | Antidepressant   | 2741            | 12.13      |
| Citalopram        | Antidepressant   | 2384            | 10.55      |
| Amitriptyline     | Antidepressant   | 1525            | 6.75       |
| Vortioxetine      | Antidepressant   | 1032            | 4.57       |
| Paroxetine        | Antidepressant   | 802             | 3.55       |
| Clomipramine      | Antidepressant   | 580             | 2.57       |
| Agomelatine       | Antidepressant   | 523             | 2.31       |
| Moclobemide       | Antidepressant   | 338             | 1.50       |
| Escitalopram      | Antidepressant   | 103             | 0.46       |
| Quetiapine        | Antipsychotic    | 5466            | 24.18      |
| Polytherapy       | Antipsychotic    | 2679            | 11.85      |
| Olanzapine        | Antipsychotic    | 2337            | 10.34      |
| Levomepromazine   | Antipsychotic    | 1696            | 7.50       |
| Aripiprazole      | Antipsychotic    | 1587            | 7.02       |
| Risperidone       | Antipsychotic    | 858             | 3.80       |
| Flupentixol       | Antipsychotic    | 521             | 2.31       |
| Haloperidol       | Antipsychotic    | 238             | 1.05       |
| Zuclopenthixol    | Antipsychotic    | 144             | 0.64       |
| Any LAI           | Antipsychotic    | 71              | 0.31       |
| Clozapine         | Antipsychotic    | 36              | 0.16       |
| Lamotrigine       | Mood Stabilizer  | 5415            | 23.96      |
| Valproic acid     | Mood Stabilizer  | 1076            | 4.76       |
| Topiramate        | Mood Stabilizer  | 678             | 3.00       |
| Polytherapy       | Mood Stabilizer  | 666             | 2.95       |
| Carbamazepine     | Mood Stabilizer  | 653             | 2.89       |
| Lithium           | Mood Stabilizer  | 513             | 2.27       |
| Methylphenidate   | ADHD Medication  | 4256            | 18.83      |
| Lisdexamphetamine | ADHD Medication  | 2580            | 11.42      |
| Polytherapy       | ADHD Medication  | 1927            | 8.53       |
| Atomoxetine       | ADHD Medication  | 1125            | 4.98       |
| Dexamfetamine     | ADHD Medication  | 459             | 2.03       |

Abbreviations: LAI=Long-Acting Injectable

**eTable 2.** The Association Between Use vs Nonuse of Medications and Risk of Attempted or Completed Suicide in Within-Individual Analysis

| Treatment         | Medication group | HR   | 95%CI     | P-value |
|-------------------|------------------|------|-----------|---------|
| Vortioxetine      | Antidepressant   | 0.69 | 0.49-0.99 | 0.044   |
| Bupropion         | Antidepressant   | 1.00 | 0.76-1.31 | 0.978   |
| Citalopram        | Antidepressant   | 1.05 | 0.82-1.34 | 0.688   |
| Escitalopram      | Antidepressant   | 1.11 | 0.50-2.48 | 0.792   |
| Sertraline        | Antidepressant   | 1.23 | 1.06-1.41 | 0.006   |
| Fluvoxamine       | Antidepressant   | 1.23 | 1.04-1.46 | 0.017   |
| Mirtazapine       | Antidepressant   | 1.24 | 0.99-1.56 | 0.062   |
| Moclobemide       | Antidepressant   | 1.27 | 0.67-2.40 | 0.468   |
| Amitriptyline     | Antidepressant   | 1.28 | 0.77-2.13 | 0.339   |
| Venlafaxine       | Antidepressant   | 1.37 | 1.19-1.58 | <0.001  |
| Duloxetine        | Antidepressant   | 1.39 | 1.18-1.65 | <0.001  |
| Polytherapy       | Antidepressant   | 1.45 | 1.29-1.63 | <0.001  |
| Clomipramine      | Antidepressant   | 1.53 | 1.21-1.93 | <0.001  |
| Fluoxetine        | Antidepressant   | 1.53 | 1.34-1.75 | <0.001  |
| Agomelatine       | Antidepressant   | 1.56 | 0.89-2.74 | 0.120   |
| Paroxetine        | Antidepressant   | 1.80 | 1.32-2.45 | <0.001  |
|                   |                  |      |           |         |
| Clozapine         | Antipsychotic    | 0.87 | 0.42-1.81 | 0.712   |
| Quetiapine        | Antipsychotic    | 1.01 | 0.89-1.14 | 0.889   |
| Levomepromazine   | Antipsychotic    | 1.13 | 0.96-1.34 | 0.153   |
| Olanzapine        | Antipsychotic    | 1.20 | 0.99-1.45 | 0.061   |
| Any LAI           | Antipsychotic    | 1.24 | 0.86-1.79 | 0.252   |
| Polytherapy       | Antipsychotic    | 1.29 | 1.15-1.44 | <0.001  |
| Risperidone       | Antipsychotic    | 1.38 | 1.03-1.85 | 0.029   |
| Aripiprazole      | Antipsychotic    | 1.38 | 1.13-1.69 | 0.002   |
| Haloperidol       | Antipsychotic    | 1.52 | 1.06-2.17 | 0.022   |
| Flupentixol       | Antipsychotic    | 2.00 | 1.23-3.26 | 0.006   |
| Zuclopenthixol    | Antipsychotic    | 2.09 | 1.31-3.33 | 0.002   |
|                   |                  |      |           |         |
| Lithium           | Mood Stabilizer  | 0.81 | 0.62-1.04 | 0.101   |
| Valproic acid     | Mood Stabilizer  | 0.96 | 0.79-1.18 | 0.713   |
| Lamotrigine       | Mood Stabilizer  | 1.00 | 0.88-1.13 | 0.960   |
| Polytherapy       | Mood Stabilizer  | 1.08 | 0.82-1.42 | 0.582   |
| Carbamazepine     | Mood Stabilizer  | 1.14 | 0.85-1.51 | 0.386   |
| Topiramate        | Mood Stabilizer  | 1.19 | 0.94-1.50 | 0.152   |
|                   |                  |      |           |         |
| Polytherapy       | ADHD Medication  | 0.75 | 0.51-1.10 | 0.139   |
| Lisdexamphetamine | ADHD Medication  | 0.78 | 0.63-0.97 | 0.027   |
| Methylphenidate   | ADHD Medication  | 0.84 | 0.72-0.97 | 0.021   |
| Atomoxetine       | ADHD Medication  | 0.86 | 0.63-1.16 | 0.317   |
| Dexamfetamine     | ADHD Medication  | 0.98 | 0.60-1.60 | 0.934   |

Abbreviations: HR=Hazard Ratio, 95% CI=95% Confidence Interval and LAI=Long-Acting Injectable

**eTable 3.** The Association Between Use vs Nonuse of Medications and Risk of Attempted or Completed Suicide in Between-Individual Analysis

| Treatment         | Medication group | HR   | 95%CI     | P-value |
|-------------------|------------------|------|-----------|---------|
| Amitriptyline     | Antidepressant   | 0.97 | 0.70-1.33 | 0.840   |
| Bupropion         | Antidepressant   | 0.99 | 0.79-1.22 | 0.889   |
| Moclobemide       | Antidepressant   | 1.09 | 0.65-1.83 | 0.757   |
| Mirtazapine       | Antidepressant   | 1.09 | 0.94-1.27 | 0.252   |
| Escitalopram      | Antidepressant   | 1.21 | 0.50-2.91 | 0.674   |
| Citalopram        | Antidepressant   | 1.25 | 1.07-1.46 | 0.006   |
| Fluvoxamine       | Antidepressant   | 1.28 | 1.14-1.44 | <0.001  |
| Agomelatine       | Antidepressant   | 1.30 | 0.94-1.79 | 0.114   |
| Venlafaxine       | Antidepressant   | 1.32 | 1.19-1.47 | <0.001  |
| Clomipramine      | Antidepressant   | 1.40 | 1.18-1.66 | <0.001  |
| Polytherapy       | Antidepressant   | 1.41 | 1.26-1.57 | <0.001  |
| Sertraline        | Antidepressant   | 1.45 | 1.24-1.69 | <0.001  |
| Vortioxetine      | Antidepressant   | 1.56 | 0.97-2.51 | 0.068   |
| Duloxetine        | Antidepressant   | 1.57 | 1.28-1.92 | <0.001  |
| Fluoxetine        | Antidepressant   | 1.58 | 1.42-1.76 | <0.001  |
| Paroxetine        | Antidepressant   | 1.79 | 1.06-3.02 | 0.029   |
|                   |                  |      |           |         |
| Clozapine         | Antipsychotic    | 1.12 | 0.68-1.84 | 0.665   |
| Risperidone       | Antipsychotic    | 1.20 | 0.99-1.45 | 0.064   |
| Quetiapine        | Antipsychotic    | 1.20 | 1.06-1.35 | 0.004   |
| Flupentixol       | Antipsychotic    | 1.24 | 0.95-1.62 | 0.107   |
| Levomepromazine   | Antipsychotic    | 1.25 | 1.08-1.45 | 0.003   |
| Olanzapine        | Antipsychotic    | 1.43 | 1.25-1.63 | <0.001  |
| Aripiprazole      | Antipsychotic    | 1.47 | 1.27-1.69 | <0.001  |
| Haloperidol       | Antipsychotic    | 1.64 | 1.27-2.10 | <0.001  |
| Any LAI           | Antipsychotic    | 1.67 | 1.16-2.39 | 0.006   |
| Polytherapy       | Antipsychotic    | 1.82 | 1.58-2.11 | <0.001  |
| Zuclopenthixol    | Antipsychotic    | 1.87 | 1.29-2.70 | 0.001   |
|                   |                  |      |           |         |
| Lithium           | Mood Stabilizer  | 0.96 | 0.75-1.23 | 0.744   |
| Carbamazepine     | Mood Stabilizer  | 0.98 | 0.81-1.19 | 0.869   |
| Lamotrigine       | Mood Stabilizer  | 0.99 | 0.88-1.11 | 0.802   |
| Polytherapy       | Mood Stabilizer  | 1.06 | 0.83-1.35 | 0.643   |
| Topiramate        | Mood Stabilizer  | 1.23 | 0.97-1.56 | 0.084   |
| Valproic acid     | Mood Stabilizer  | 1.24 | 0.86-1.78 | 0.255   |
|                   |                  |      |           |         |
| Methylphenidate   | ADHD Medication  | 0.89 | 0.79-1.00 | 0.057   |
| Lisdexamphetamine | ADHD Medication  | 0.90 | 0.76-1.06 | 0.202   |
| Polytherapy       | ADHD Medication  | 0.94 | 0.67-1.34 | 0.744   |
| Atomoxetine       | ADHD Medication  | 0.95 | 0.76-1.19 | 0.659   |
| Dexamfetamine     | ADHD Medication  | 1.01 | 0.41-2.49 | 0.989   |

Abbreviations: HR=Hazard Ratio, 95% CI=95% Confidence Interval and LAI=Long-Acting Injectable

## eFigure 1. Study Design

### A Illustration how comparisons are constructed in within-individual design (within a drug class)

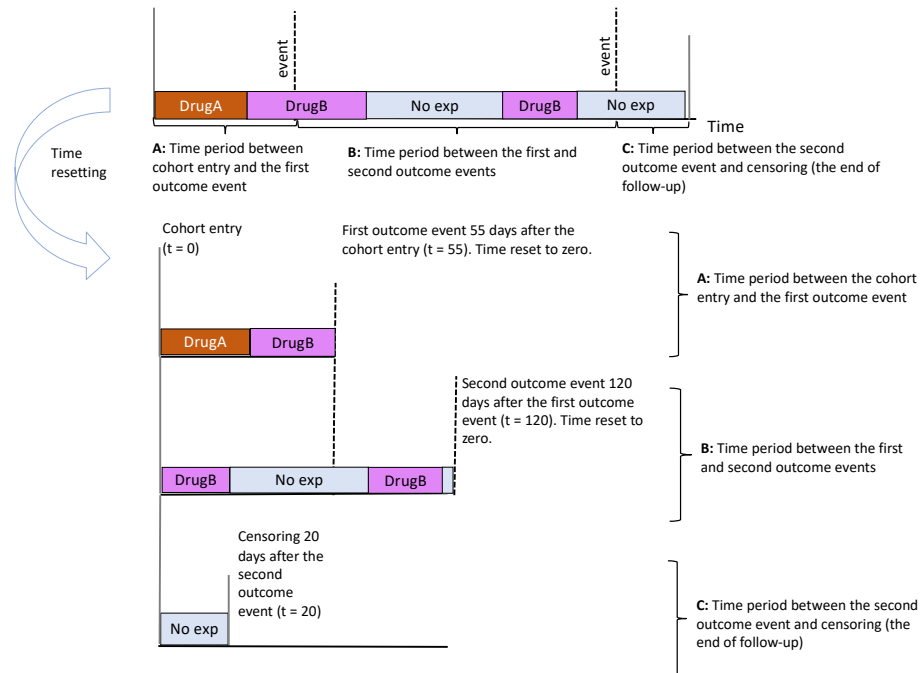

### B Concomitant psychotropic medications are adjusted for in the analyses (on drug-class level in this simplified example)

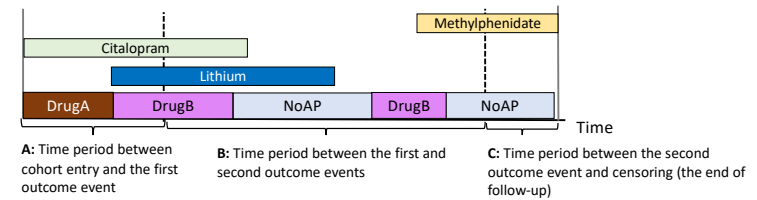

#### Analyses dataset structure for the above drug use history

| row# | ID | start | stop | AP    | MS | AD  | ADHD | series | cancel | init | end |
|------|----|-------|------|-------|----|-----|------|--------|--------|------|-----|
| 1    | 3  | 1     | 25   | DrugA | 0  | Cit | 0    | 1      | 0      | 1    | 25  |
| 2    | 3  | 26    | 55   | DrugB | Li | Cit | 0    | 1      | 1      | 26   | 55  |
| 3    | 3  | 56    | 82   | DrugB | Li | Cit | 0    | 2      | 0      | 1    | 27  |
| 4    | 3  | 83    | 90   | NoAP  | Li | Cit | 0    | 2      | 0      | 28   | 35  |
| 5    | 3  | 91    | 125  | NoAP  | Li | 0   | 0    | 2      | 0      | 36   | 70  |
| 6    | 3  | 126   | 133  | NoAP  | 0  | 0   | 0    | 2      | 0      | 71   | 78  |
| 7    | 3  | 134   | 155  | DrugB | 0  | 0   | 0    | 2      | 0      | 79   | 100 |
| 8    | 3  | 156   | 167  | DrugB | 0  | 0   | MPh  | 2      | 0      | 101  | 112 |
| 9    | 3  | 168   | 175  | NoAP  | 0  | 0   | MPh  | 2      | 1      | 113  | 120 |
| 10   | 3  | 176   | 196  | NoAP  | 0  | 0   | MPh  | 3      | 0      | 1    | 20  |

**start** and **stop** describe continuous time since cohort entry (start=1) until the end of follow-up (stop=196) as days, and they form the basis for the between-individual model.

**AP**=antipsychotic describes the time-varying use of two specific antipsychotics (DrugA and DrugB) and non-use of antipsychotics (NoAP).

**MS** (mood stabilizer), **AD** (antidepressant), and **ADHD** (drugs for the treatment of ADHD) describe time-varying use of these medications on drug level (Li=lithium, Cit=citalopram, and MPH=methylphenidate as examples).

**series** indicates which rows belong to the same series of within-individual models (time is reset to zero in **init** and **end** variables when the series changes).

**cancel** indicates whether the period ended at the outcome event (cancel=1) or censoring (cancel=0). After **cancel=1**, time is reset, and the next row starts with **init=1**.

**init** and **end** assign time variables for the within-individual model (where time is reset to zero after each outcome event).

Row in the analyses dataset changes every time there is a change in exposures (AP, MS, AD, or ADHD) or outcome event happens.

**A)** In the within-individual design, each individual forms his/her own stratum. Within each stratum, time is reset after each outcome event. Use of different specific drugs (antipsychotics in this example, DrugA and DrugB in this example) vs. non-use of (“No exp”) are treated as time-varying exposures in the stratified Cox model. After resetting, time periods from the same individual are used in comparisons in the same way as different individuals are compared in a traditional Cox model (in the case of time-varying exposure). The method is described in: Paul D Allison: Fixed Effects Regression Models, SAGE Publications, 2009. **B)** Illustration how concomitant psychotropic medications are taken into account in the analyses.

**eFigure 2.** Associations Between the Results From Within-Individual Modeling and Between-Individual Modeling

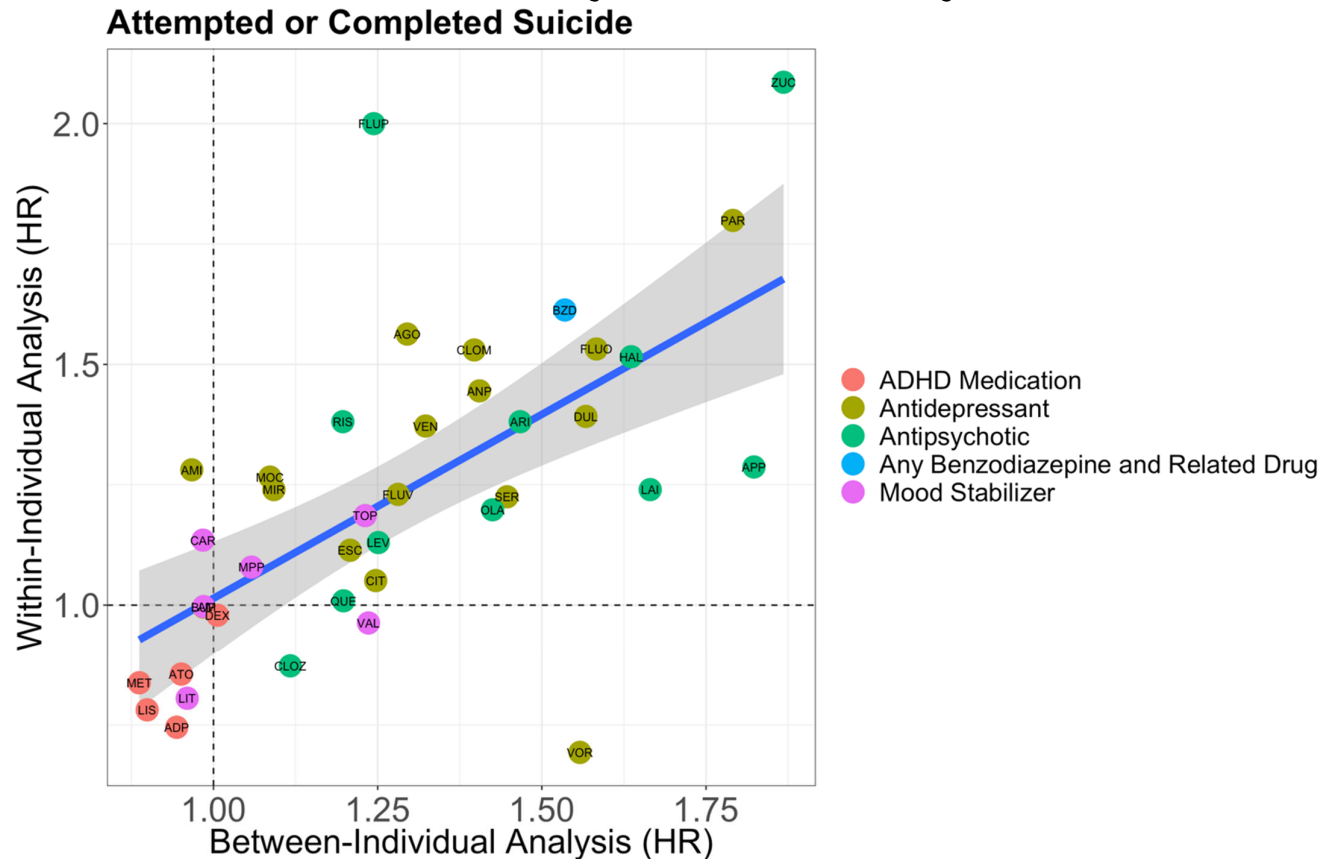

Spearman's rho=0.674, Pearson correlation=0.642. Dashed lines represent Hazard Ratio=1.0. Shaded grey represents 95%CI. Abbreviations: ADP=ADHD medication polytherapy, AGO=Agomelatine, AMI=Amitriptyline, ANP=Antidepressant polytherapy, APP=AP Polytherapy, ARI=Aripiprazole, ATO=Atomoxetine, BUP=Bupropion, BZD=Any benzodiazepine and related drug, CAR=Carbamazepine, CIT=Citalopram, CLOM=Clomipramine, CLOZ=Clozapine, DEX=Dexamfetamine, DUL=Duloxetine, ESC=Escitalopram, FLUO=Fluoxetine, FLUP=Flupentixol, FLUV=Fluvoxamine, HAL=Haloperidol, LAI=Any LAI, LAM=Lamotrigine, LEV=Levomopromazine, LIS=Lisdexamphetamine, LIT=Lithium, MET=Methylphenidate, MIR=Mirtazapine, MOC=Moclobemide, MPP=Mood stabilizer polytherapy, OLA=Olanzapine, PAR=Paroxetine, QUE=Quetiapine, RIS=Risperidone, SER=Sertraline, TOP=Topiramate, VAL=Valproic acid, VEN=Venlafaxine, VOR=Vortioxetine, ZUC=Zuclopentixol.
