# Supplementary material for: Comparative Effectiveness of Pharmacotherapies for the Risk of Attempted or Completed Suicide Among Persons With Borderline Personality Disorder
Source: PubMed Central journal article supplement (PMC10248738; doi:10.1001/jamanetworkopen.2023.17130), 2023-06-07
Supplement: jamanetwopen-e2317130-s002.pdf [file jamanetwopen-e2317130-s002.pdf]

## Data Sharing Statement

Lieslehto. Comparative Effectiveness of Pharmacotherapies for the Risk of Attempted or Completed Suicide Among Persons With Borderline Personality Disorder. *JAMA Netw Open*. Published June 07, 2023. doi:10.1001/jamanetworkopen.2023.17130

### Data

**Data available:** No
